# Supplementary material for: Synthesis and Chemical and Biological Evaluation of a Glycine Tripeptide Chelate of Magnesium
Source: Molecules. 2021 Apr 21;26(9):2419. doi: 10.3390/molecules26092419 (PMC8122334; doi:10.3390/molecules26092419)
Supplement: Supplementary file 1 [file molecules-26-02419-s001.zip › molecules-1164852-supplementary.pdf]

## Supplemental Information

### Synthesis and Chemical and Biological Evaluation of a Glycine Tripeptide Chelate of Magnesium-

Derek R. Case, Jon Zubieta, Ren Gonzalez and Robert P. Doyle

#### Table of Contents

|                                                                                                   |         |
|---------------------------------------------------------------------------------------------------|---------|
| <sup>1</sup> H NMR of Magnesium <i>Bis</i> glycinate (S1).....                                    | Page 2  |
| FT-IR of G <sub>3</sub> and MgG <sub>3</sub> (S2).....                                            | Page 3  |
| DSC of MgG <sub>3</sub> (S3).....                                                                 | Page 4  |
| TGA of MgG <sub>3</sub> (S4).....                                                                 | Page 5  |
| Elemental Analysis of MgG <sub>3</sub> (S5).....                                                  | Page 6  |
| <sup>1</sup> H NMR of HG <sub>3</sub> Ligand and MgG <sub>3</sub> Complex (S6).....               | Page 7  |
| <sup>1</sup> H NMR Overlay of HG <sub>3</sub> and MgG <sub>3</sub> Full Spectra (S7).....         | Page 8  |
| <sup>1</sup> H NMR of MgG <sub>3</sub> Synthesis in Citrate Buffer (S8).....                      | Page 9  |
| <sup>1</sup> H NMR of HG <sub>3</sub> and MgG <sub>3</sub> in DMSO-d <sub>6</sub> (S9).....       | Page 10 |
| Full Spectra HSQC and HMBC of HG <sub>3</sub> (S10).....                                          | Page 11 |
| Full Spectra HSQC and HMBC of MgG <sub>3</sub> (S11).....                                         | Page 12 |
| FT-IR of Magnesium Citrate Precipitate (S12).....                                                 | Page 13 |
| <sup>13</sup> C NMR of G <sub>3</sub> and MgG <sub>3</sub> (S13).....                             | Page 14 |
| Uptake of MgG <sub>3</sub> in HEK293 Cells (S14).....                                             | Page 15 |
| Uptake of MgG <sub>3</sub> Relative to % Composition Magnesium in HEK293 Cells (S15).....         | Page 16 |
| Linear Regression of Cellular Uptake of MgG <sub>3</sub> (S16).....                               | Page 17 |
| Uptake of MgG <sub>3</sub> Relative to % Composition Magnesium in CaCo-2 Cells (S17).....         | Page 18 |
| Kinetics of MgG <sub>3</sub> Uptake in CaCo-2 Cells (S18).....                                    | Page 19 |
| <sup>1</sup> H NMR Stability Study of MgG <sub>3</sub> Over 72 hours (S19).....                   | Page 20 |
| <sup>1</sup> H NMR of MgG <sub>3</sub> Synthesis Conducted with Increasing Citric Acid (S20)..... | Page 21 |

S1

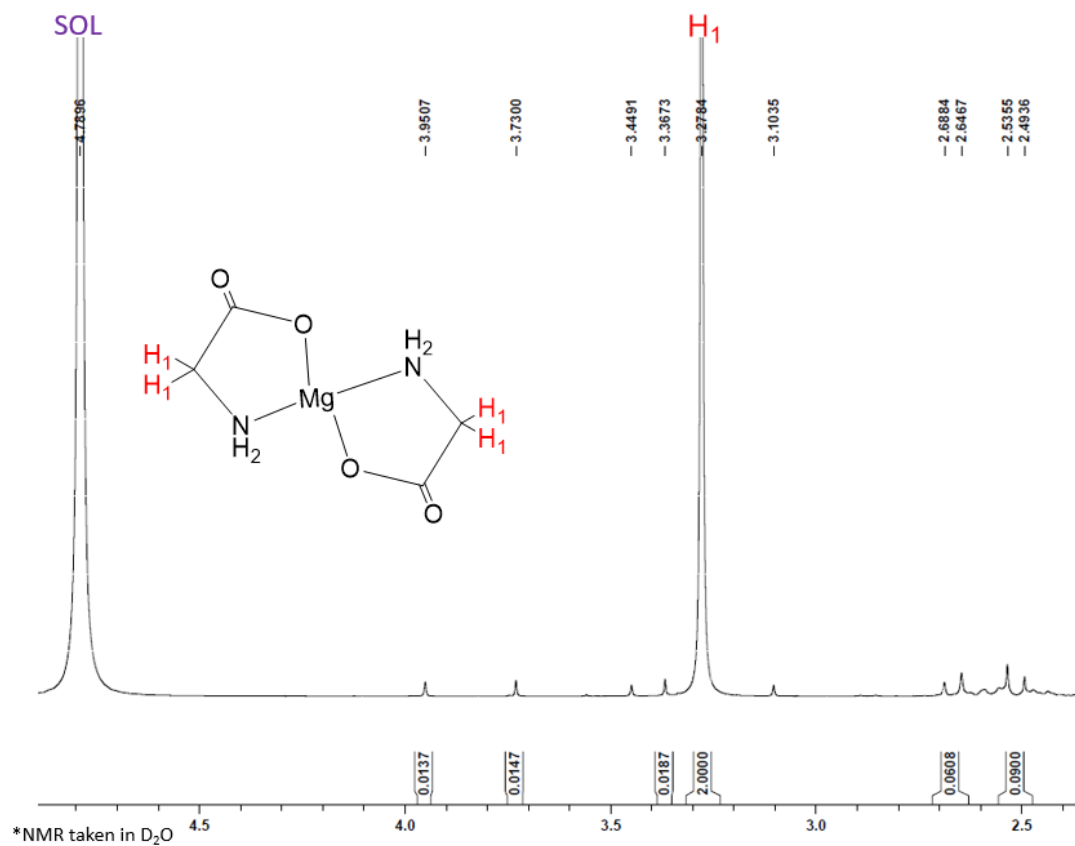

S1. <sup>1</sup>H NMR of magnesium *bis*glycinate supplied by Balchem Corp (New Hampton, NY) of 95.5% purity, showing the presence of 4.5% magnesium citrate.

## S2

| Region of Interest                          | Functional Group      | G <sub>3</sub>       | MgG <sub>3</sub>      |
|---------------------------------------------|-----------------------|----------------------|-----------------------|
| 950cm <sup>-1</sup> - 1250cm <sup>-1</sup>  | C-O                   | 991cm <sup>-1</sup>  | 1028cm <sup>-1</sup>  |
| 2500cm <sup>-1</sup> - 2700cm <sup>-1</sup> | O-H (Carboxylic Acid) | 2635cm <sup>-1</sup> | Has been deprotonated |
| 2000cm <sup>-1</sup> - 2150cm <sup>-1</sup> | R-NH <sub>2</sub> -R  | 2090cm <sup>-1</sup> | N/A                   |

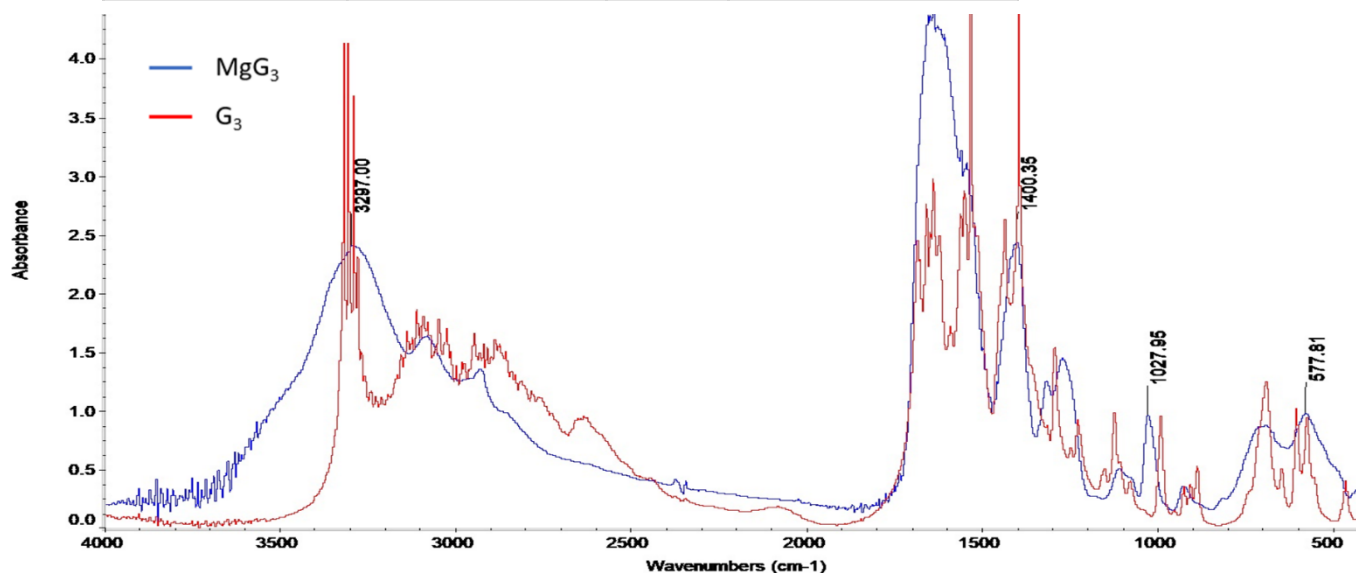

S 2. FT-IR of MgG<sub>3</sub> showing G<sub>3</sub> (red) and MgG<sub>3</sub> (blue). Infrared shows the presence of the -COOH proton for the free G<sub>3</sub> ligand, and the subsequent disappearance of this proton for complexed MgG<sub>3</sub> as observed by the flattening of the broad band observed for G<sub>3</sub> at approximately 2600cm<sup>-1</sup>. IR also shows a shift of the C-O stretch of the -COOH moiety from 991cm<sup>-1</sup> for the free G<sub>3</sub> ligand to 1028cm<sup>-1</sup> for the complex MgG<sub>3</sub>. Additionally, there is a disappearance of the R-NH<sub>2</sub>-R moiety stretch at approximately 2100cm<sup>-1</sup>

S3

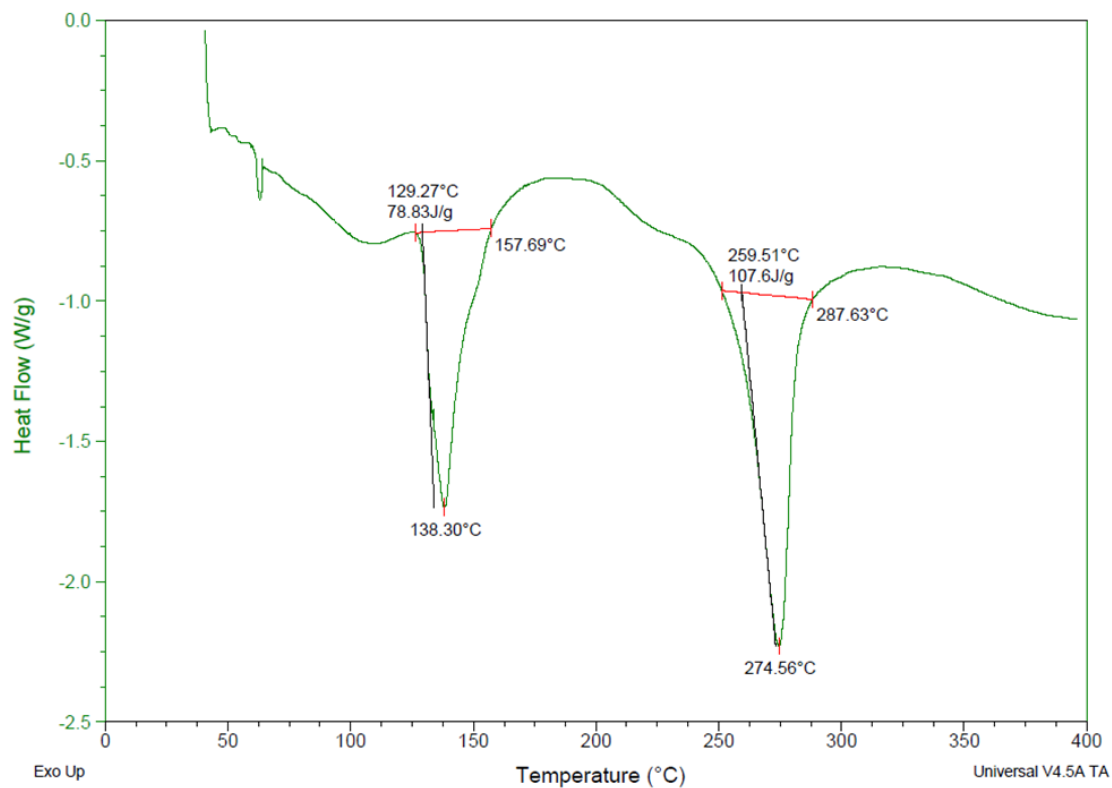

S 3. DSC of  $\text{MgG}_3$  showing three independent endotherms that are consistent with the loss of an anion, two waters and the free  $\text{G}_3$  ligand. Evidence supports a composition of  $\text{MgG}_3$  containing two waters and a hydroxide anion.  $\text{Mg-H}_2\text{O}$  complex endotherms are supported by the literature.<sup>1</sup>

S4

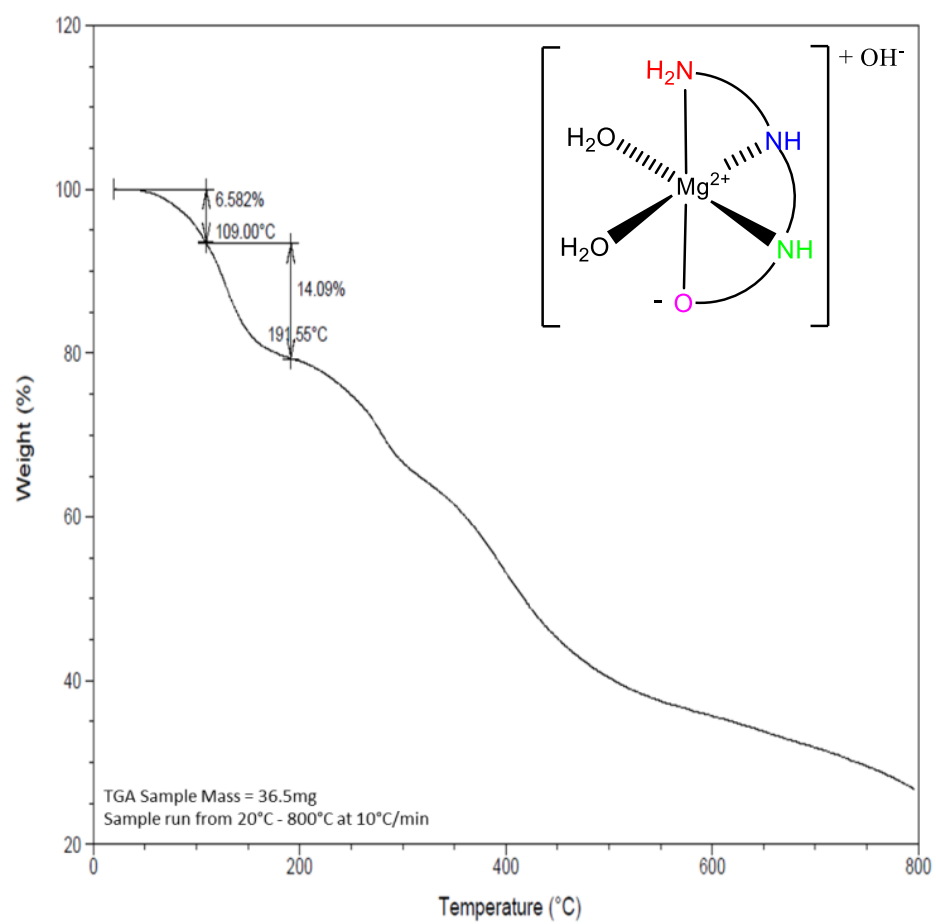

S 4. TGA of the  $\text{MgG}_3$  complex showing two percent weight decreases attributed to the hydroxy anion and the two coordinated waters.

| Elemental Analysis Values |          |            |            |
|---------------------------|----------|------------|------------|
| MgG <sub>3</sub>          | Carbon % | Nitrogen % | Hydrogen % |
| Calculated Values         | 29.00%   | 16.90%     | 5.68%      |
| Sample 1                  | 29.25%   | 16.03%     | 6.31%      |
| Sample 2                  | 29.19%   | 16.02%     | 6.12%      |
| Average Mass %            | 29.22%   | 16.03%     | 6.22%      |
| Average Error             | 0.22%    | -0.87%     | 0.54%      |

S 5. Duplicate Elemental Analysis values confirming the chemical composition of MgG<sub>3</sub>.

S6

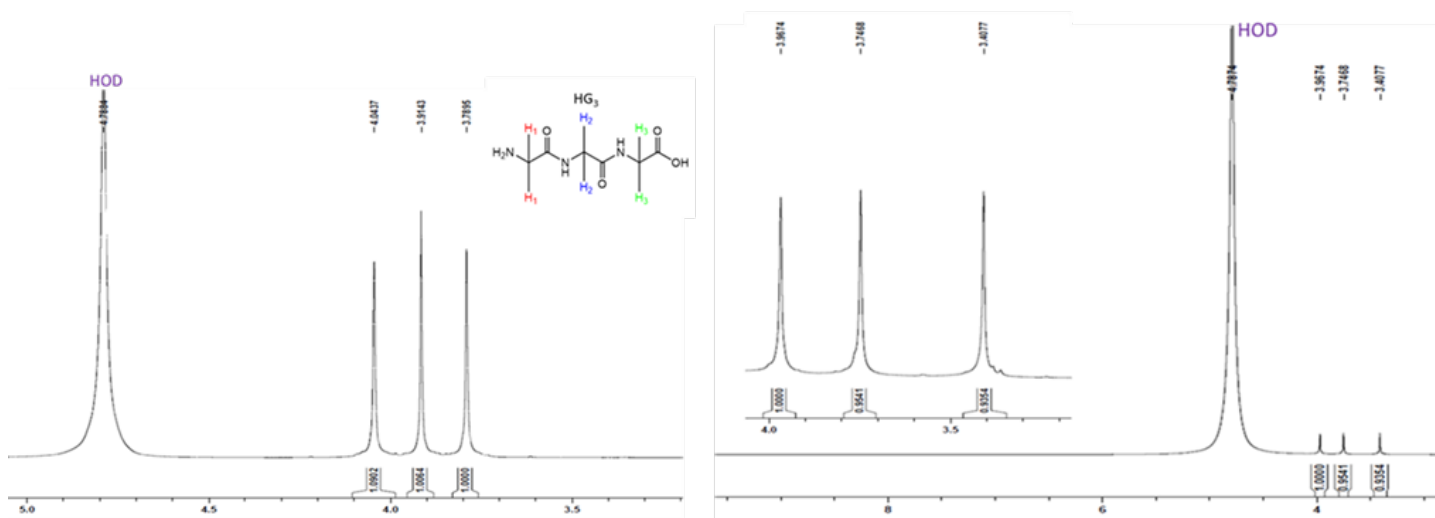

S 6.  $^1\text{H}$  NMR of  $\text{HG}_3$  (left) and  $\text{MgG}_3$  (right) showing three pure singlets of desired integration – with upfield shifting of the  $\text{MgG}_3$  complex signals.

S7

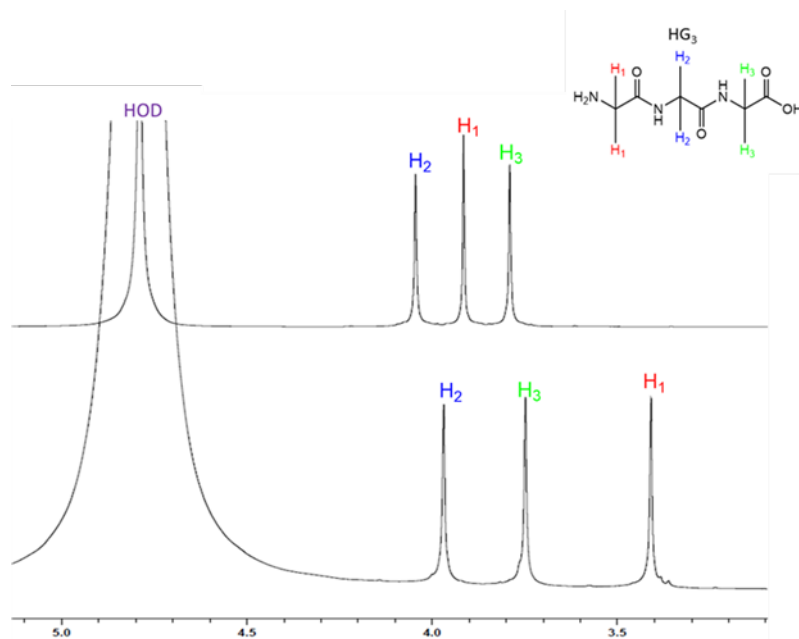

S 7.  $^1\text{H}$  NMR overlay of  $\text{HG}_3$  (**Top**) and  $\text{MgG}_3$  (**Bottom**) including solvent peak for shift verification.

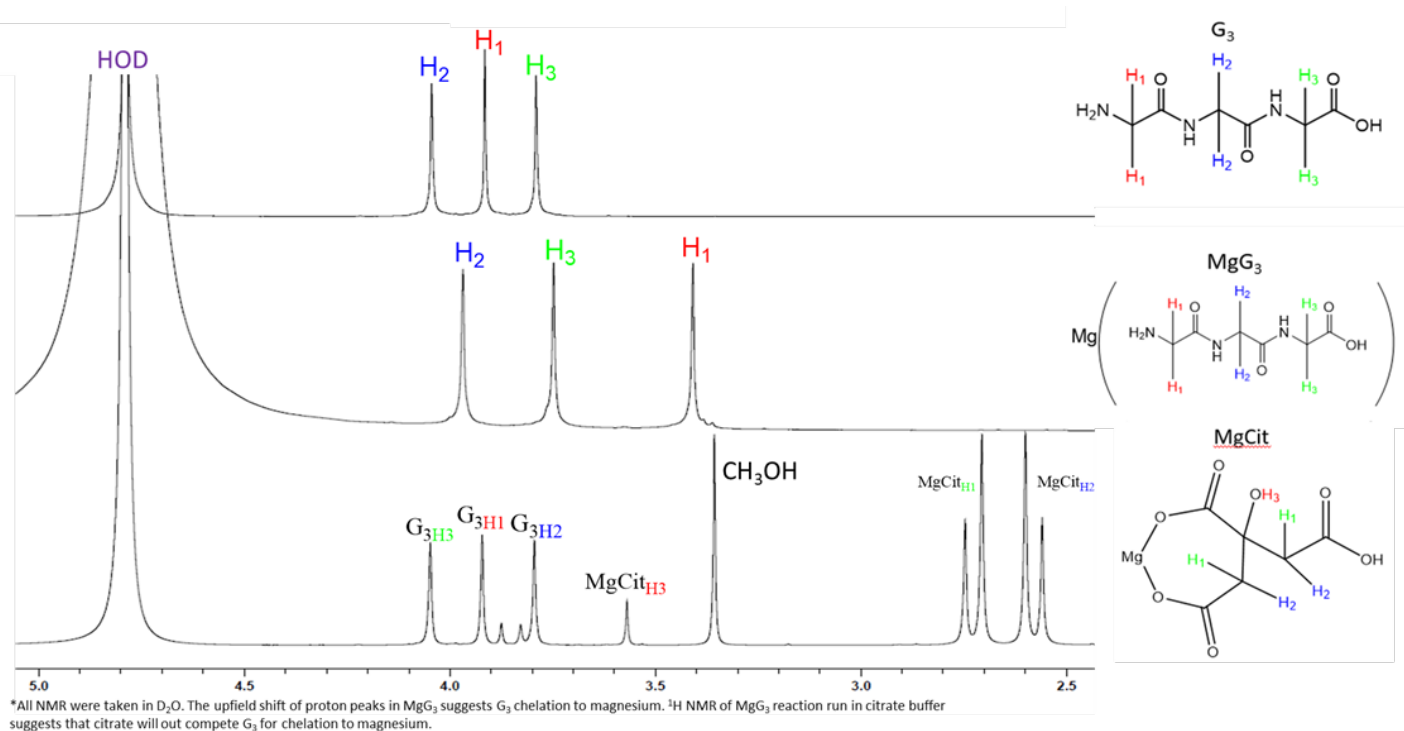

**S 8.**  $^1\text{H}$  NMR of  $\text{MgG}_3$  synthesis in reported stoichiometric conditions and citrate buffer showing propagation of reaction toward magnesium citrate when conducted in citric acid buffer.

S9

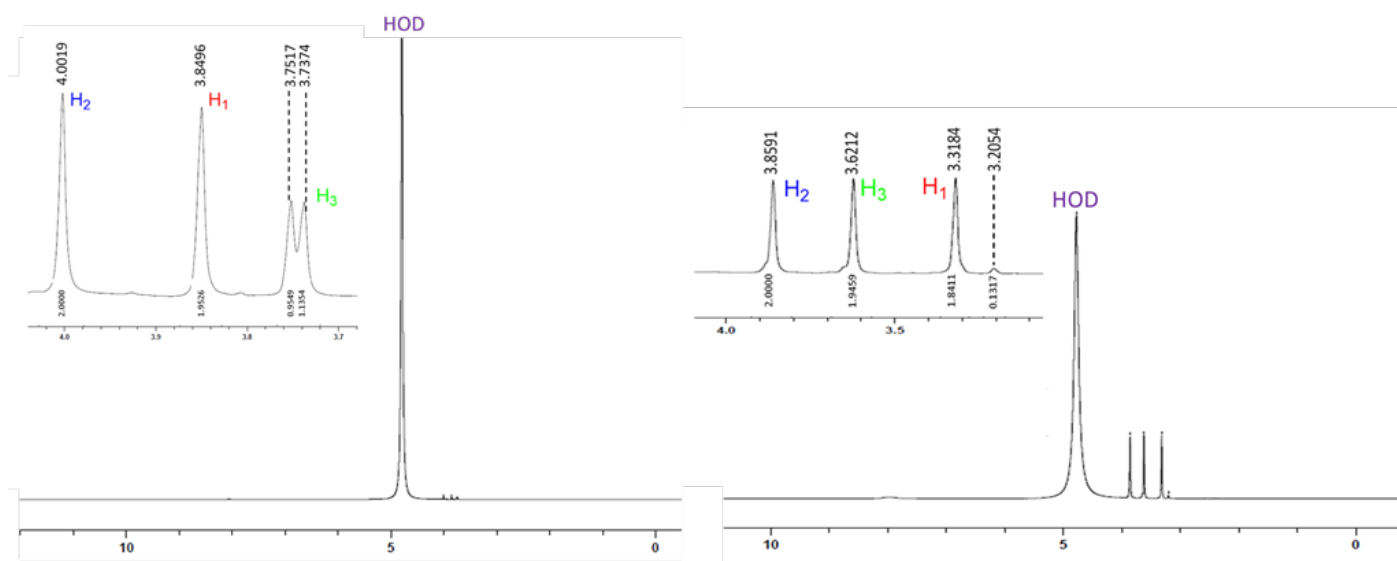

S 9. Full spectra  $^1\text{H}$  NMR of  $\text{HG}_3$  (Left) and  $\text{MgG}_3$  (Right) in  $\text{DMSO-d}_6$

S10

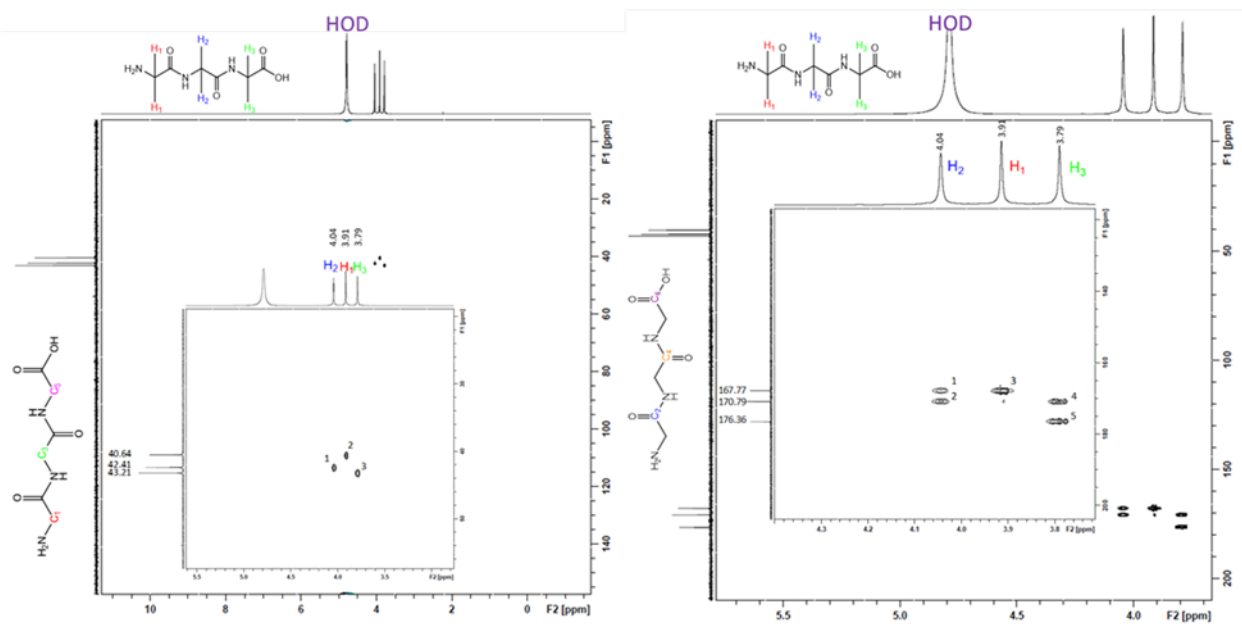

S 10. Full spectra HSQC (Left) and HMBC (Right) NMR of the free HG<sub>3</sub> ligand in a 6:1 H<sub>2</sub>O:D<sub>2</sub>O solution

S11

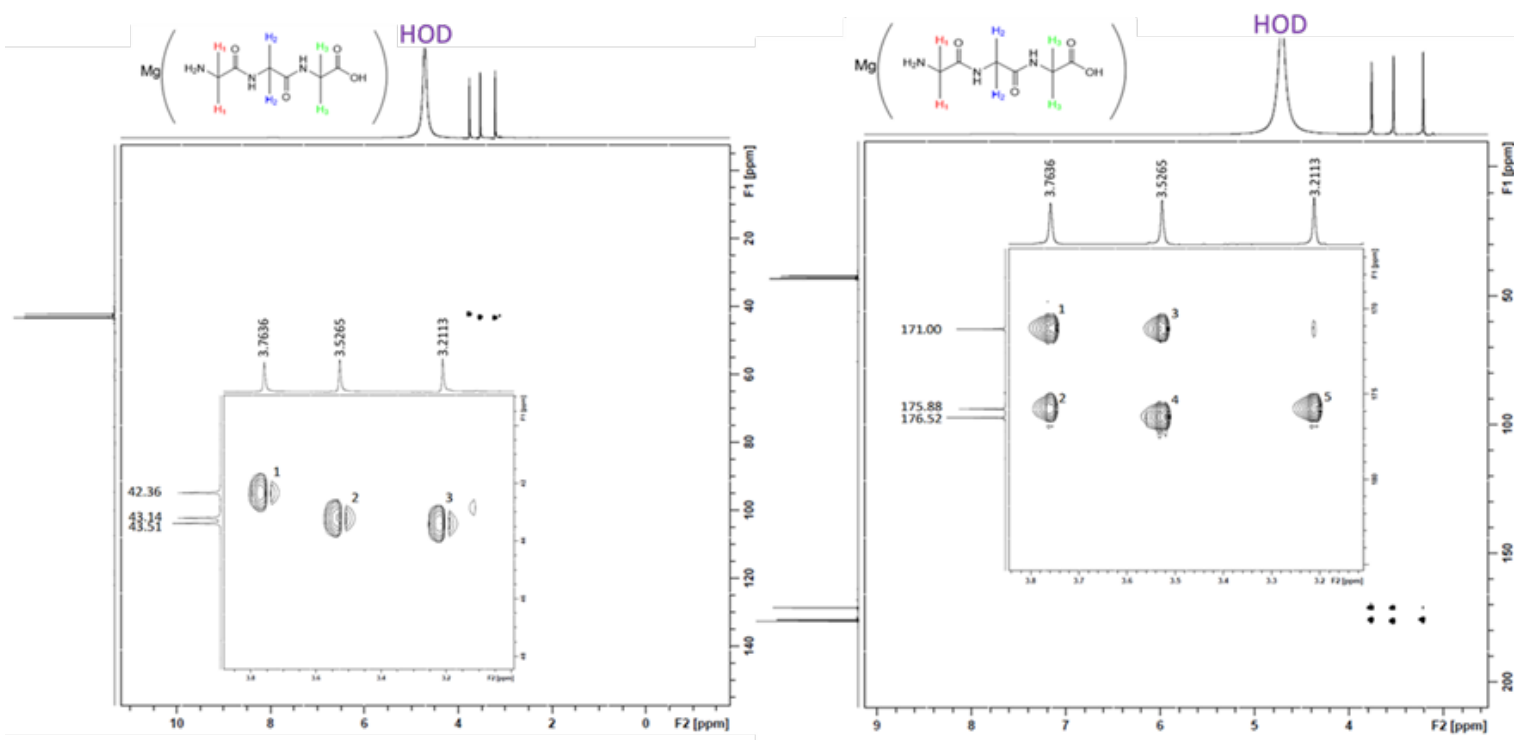

S 11. Full spectra HSQC (Left) and HMBC (Right) of  $\text{MgG}_3$  in a 6:1  $\text{H}_2\text{O}:\text{D}_2\text{O}$  solution

S12

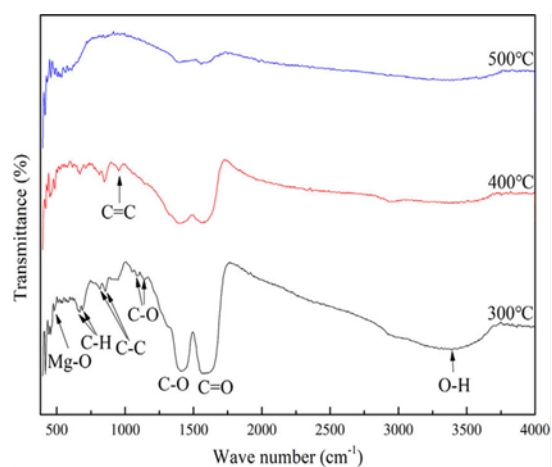

Taken from: Ding et al. DOI: 10.1016/j.ceramint.2018.12.098

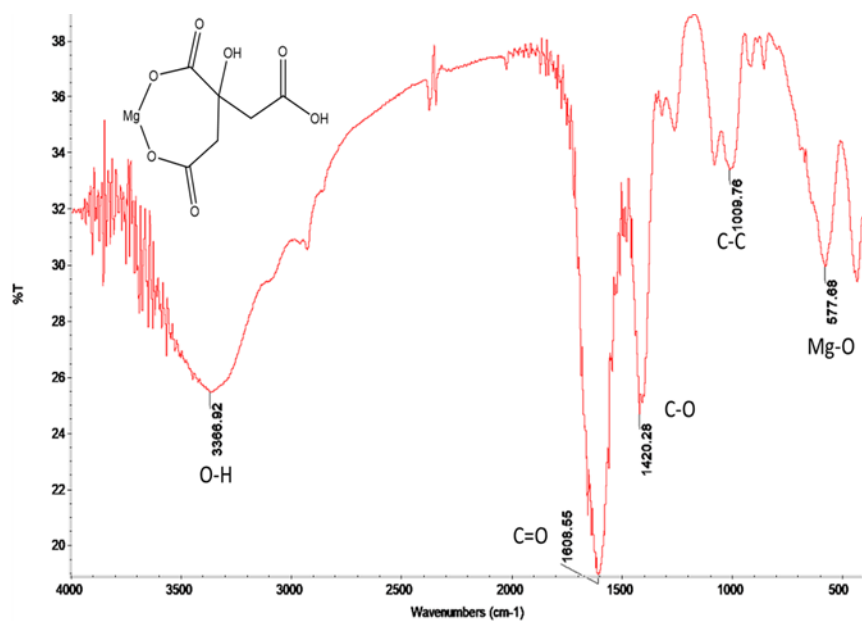

S 12. FT-IR of Precipitate Isolated from MgG<sub>3</sub> synthesis conducted in citrate buffer coincides with literature reports of magnesium citrate.<sup>2</sup>

S13

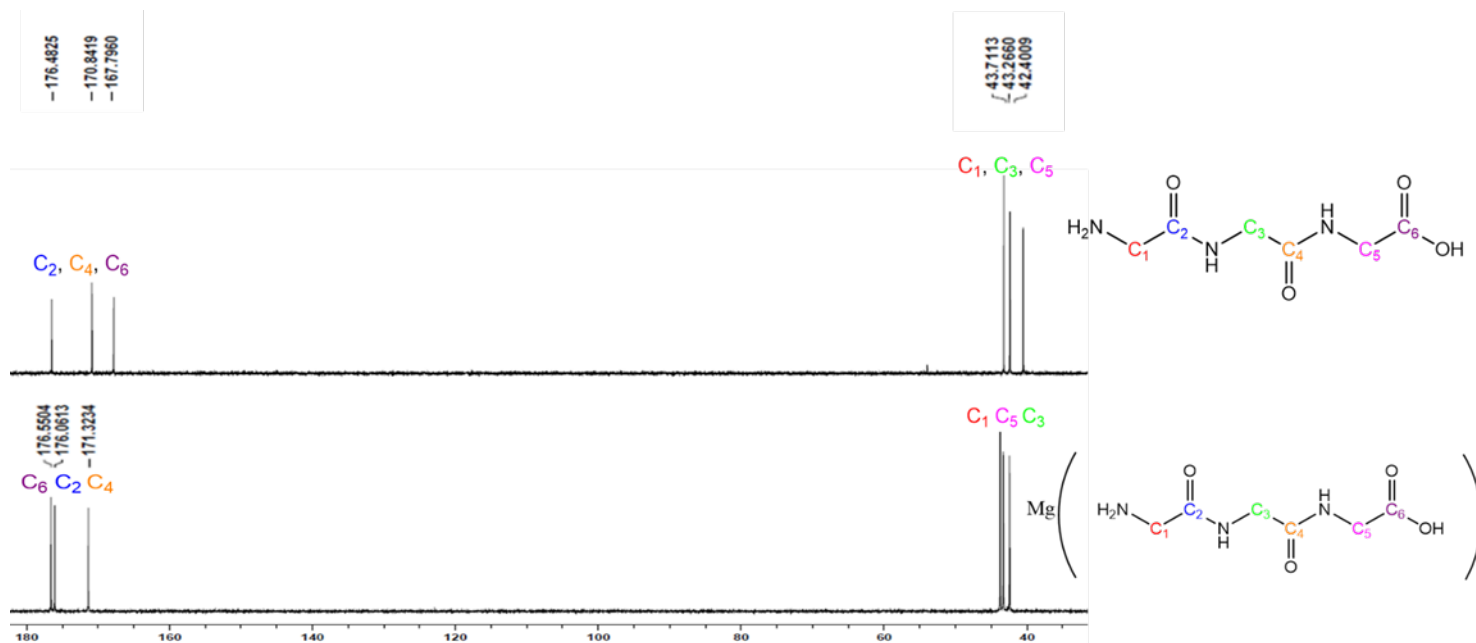

S 13.  $^{13}\text{C}$  NMR of the free  $\text{G}_3$  ligand (top) and the complex  $\text{MgG}_3$  (bottom) – as expected,  $\text{G}_3$  shows six carbons. The subsequent complexation of  $\text{G}_3$  to magnesium also shows six carbons but shows a subsequent down-field shift of carbon signals, as is expected given the upfield shift of the proton signals.

S14

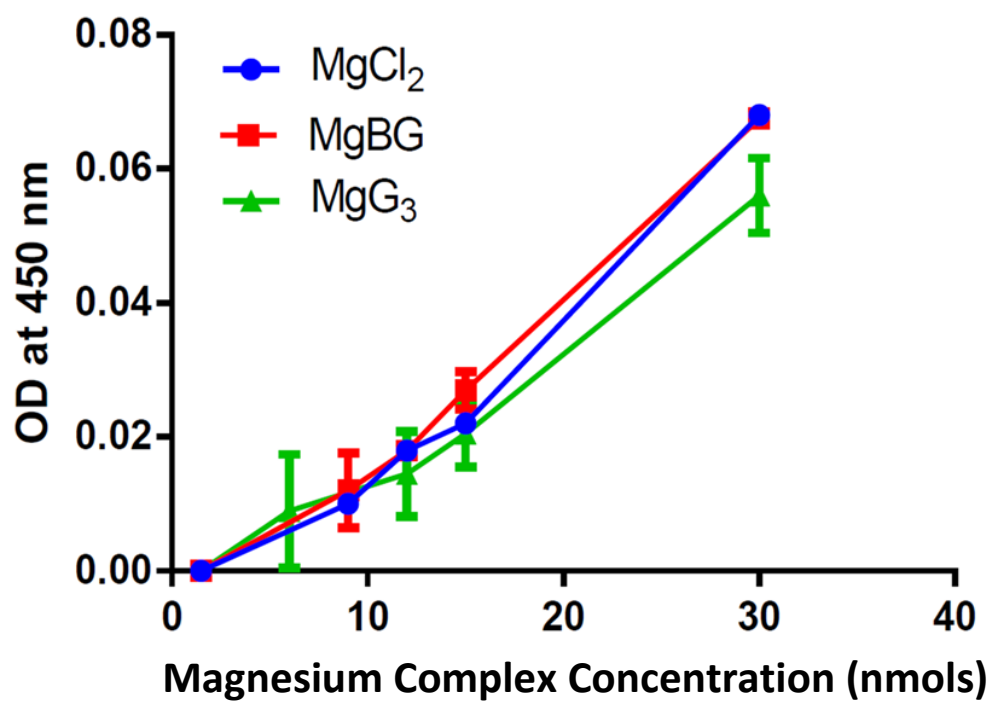

S 14. Cellular uptake of MgG<sub>3</sub> in HEK293 Cells with MgG<sub>3</sub> showing uptake comparable to that of both magnesium chloride (blue) and Balchem's magnesium bisglycinate (red).

S15

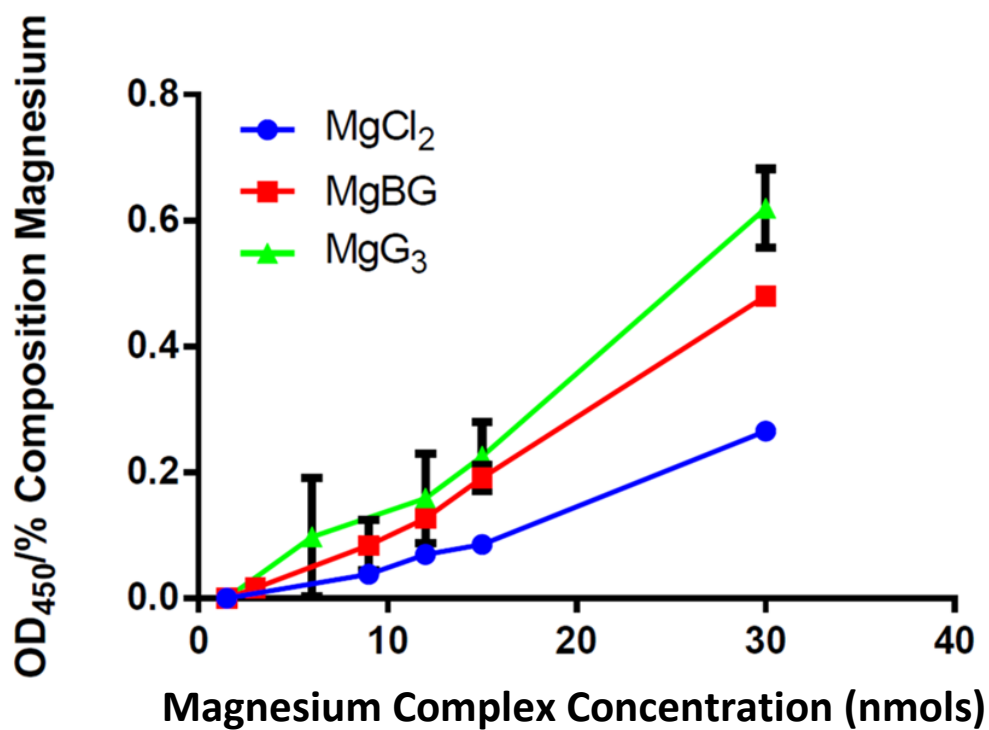

S 15. Replot of S6 showing magnesium uptake for MgG<sub>3</sub> (green), MgBG (red), and MgCl<sub>2</sub> (blue) in HEK293 cells against percent magnesium composition. At only 9% magnesium composition, MgG<sub>3</sub> shows uptake comparable to that of both MgBG and MgCl<sub>2</sub>.

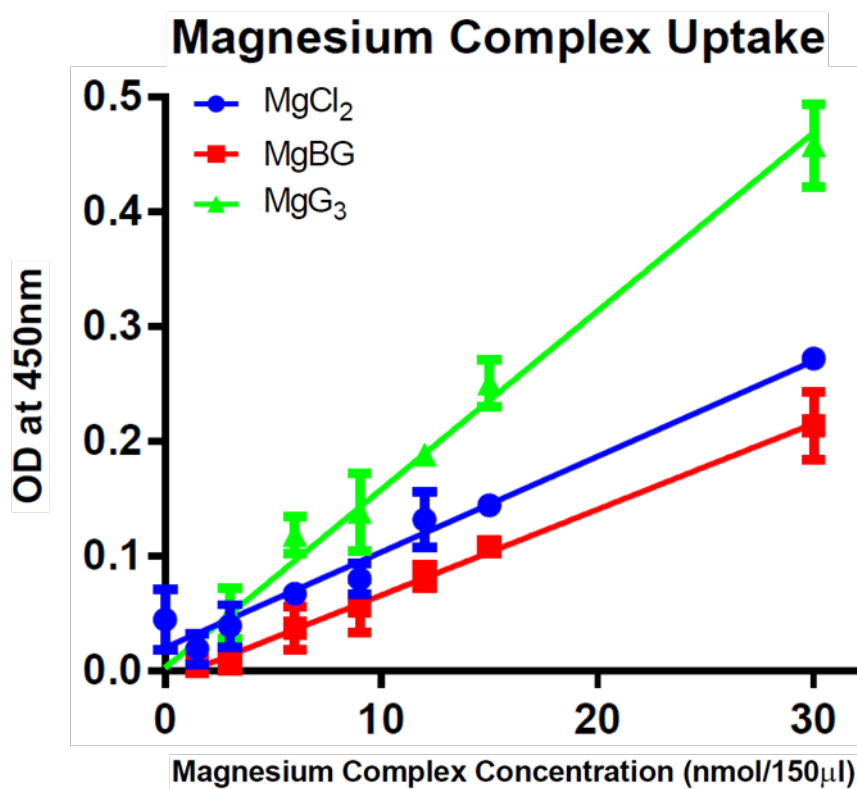

S 16. Linear regression of MgCl<sub>2</sub>, MgBG, and MgG<sub>3</sub> in CaCo-2 cells showing that uptake maintains linearity for all magnesium compounds between 0 – 30 nmol in 150µl. R<sup>2</sup> values are 0.9461, 0.9635, and 0.9766 for MgCl<sub>2</sub>, MgBG, and MgG<sub>3</sub> respectively.

S17

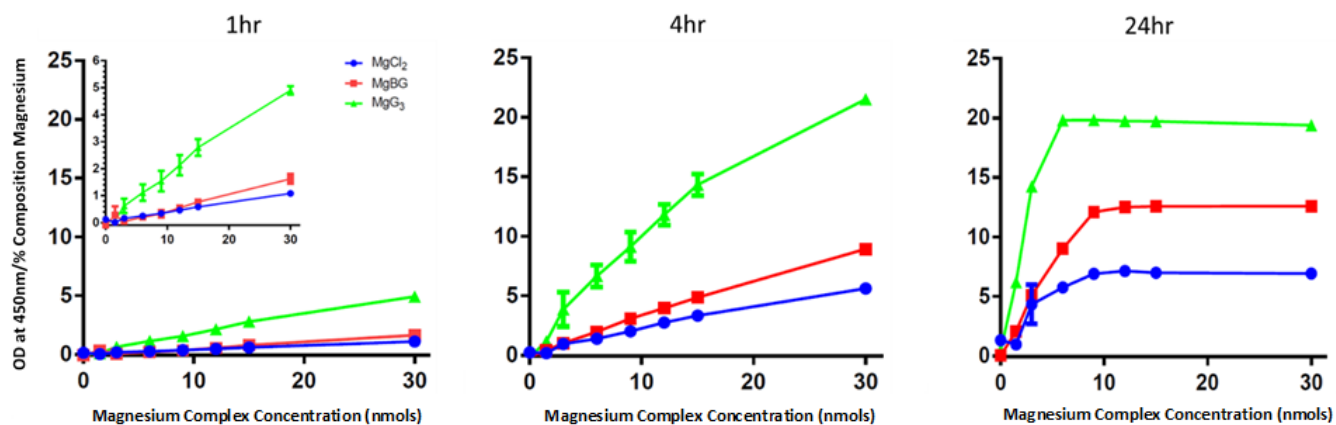

S 17. Replot of Figure 7 showing magnesium uptake for MgG<sub>3</sub> (green), MgBG (red), and MgCl<sub>2</sub> (blue) in CaCo-2 cells against percent magnesium composition. At only 9% magnesium composition, MgG<sub>3</sub> shows greater cellular uptake per percent magnesium relative to that of both MgBG and MgCl<sub>2</sub>.

S18

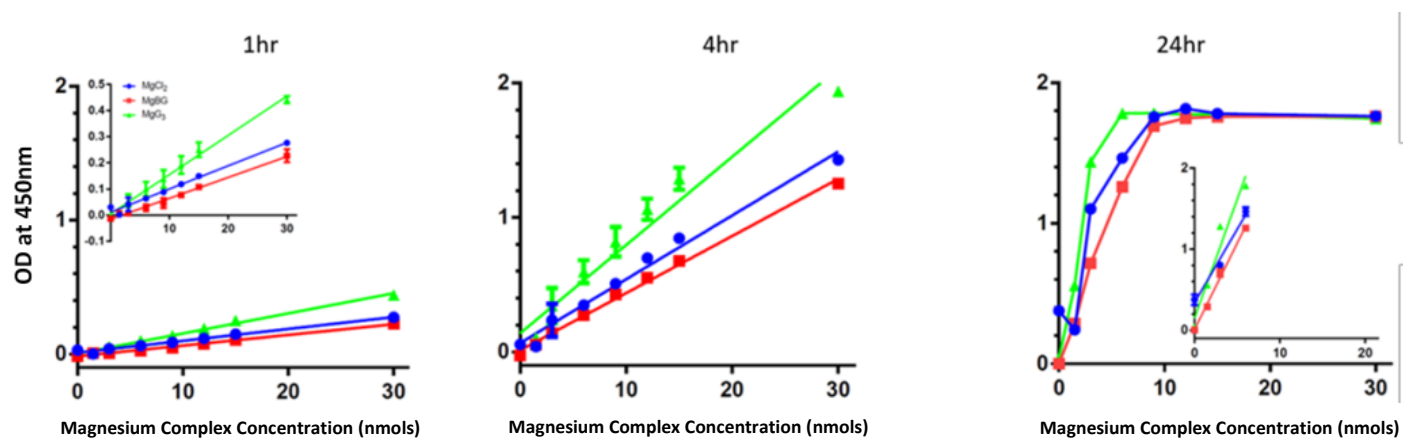

S 18. Kinetic evaluation of the cellular uptake of MgG<sub>3</sub> (green), MgBG (red), and MgCl<sub>2</sub> (blue) in CaCo-2 cells analyzed at 1hr (left), 4hr (middle), and 24hr (right – inset included to show kinetic evaluation at points before concentrations that reach cell saturation). Kinetic ratios for MgG<sub>3</sub>, MgBG, and MgCl<sub>2</sub> are relatively conserved at 1hr and 4hr time points.

S19

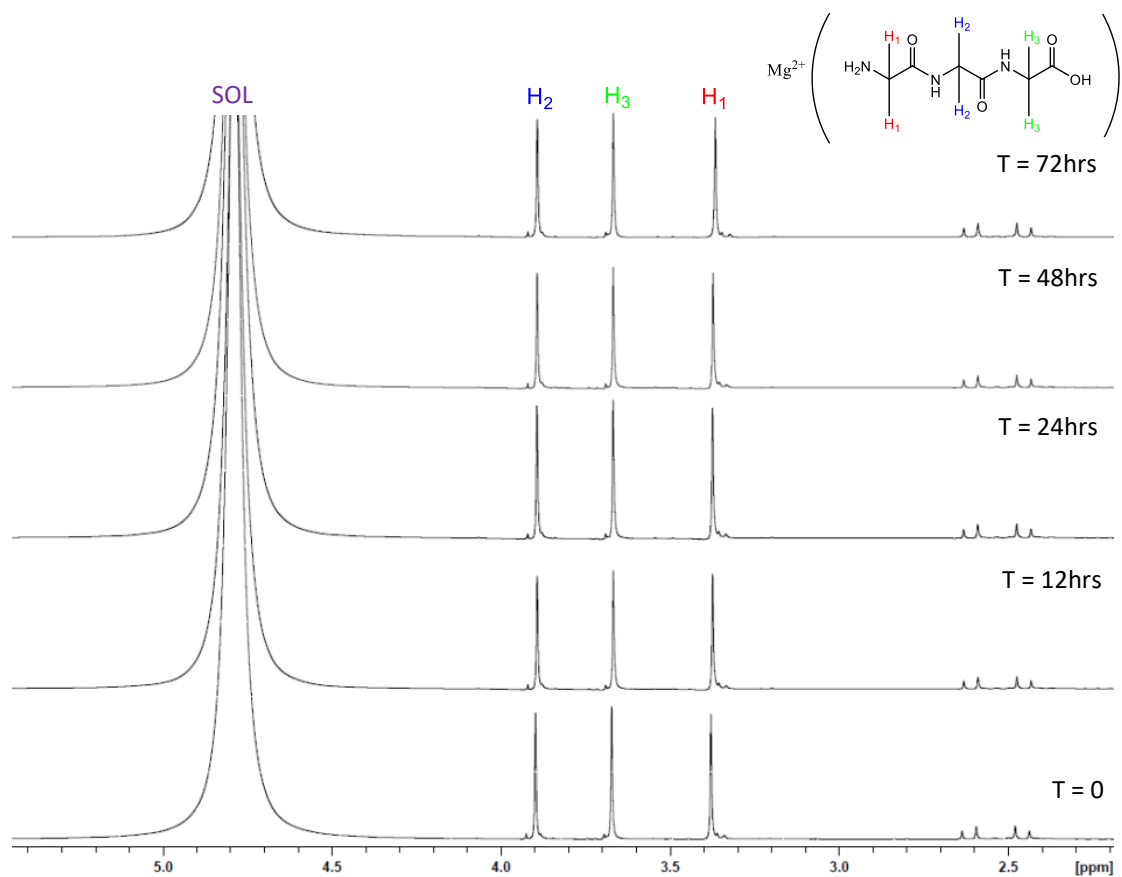

**S 19.**  $^1\text{H}$  NMR of  $\text{MgG}_3$  in a 1:6  $\text{D}_2\text{O}:\text{H}_2\text{O}$  solution showing complex stability over a 72hr period at room temperature.

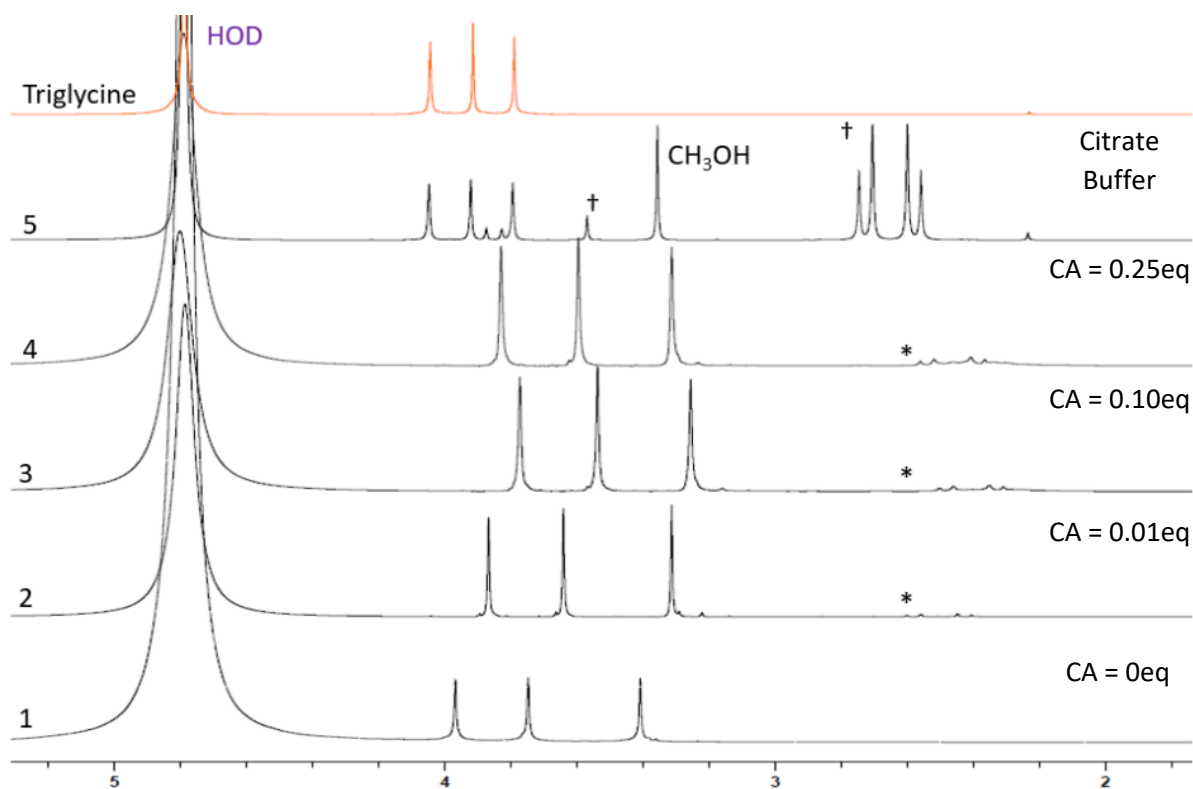

**S20.**  $^1\text{H}$  NMR showing the effect of increasing citric acid equivalents on the synthesis of  $\text{MgG}_3$ . \*Indicates peaks that are attributed solely to citric acid and † indicates peaks that are attributed to magnesium citrate – which are only present in the synthesis conducted in citrate buffer, but not in the synthesis at 0.25eq. of citric acid.

## References

- (1) Mansour, S. A. A. Thermal Decomposition of Magnesium Citrate 14-Hydrate. *Thermochim. Acta* **1994**, 233 (2), 231–242.
- (2) Ding, D.; Lv, L.; Xiao, G.; Ren, Y.; Yang, S.; Yang, P.; Hou, X. One-Step Synthesis of in Situ Multilayer Graphene Containing MgAl<sub>2</sub>O<sub>4</sub> Spinel Composite Powders. *Ceram. Int.* **2019**, 45 (5), 6209–6215.
